# Supplementary material for: A thermosensitive Pickering gel emulsion with a high oil–water ratio for long-term X-ray imaging and permanent embolization of arteries
Source: Royal Society of Chemistry journal article supplement (doi:10.1039/d2nr05963k), 2022-12-23
Supplement: d2nr05963k1.pdf [file d2nr05963k1.pdf]

## Support information

# **A thermosensitive Pickering gel emulsion with high oil-water ratio for long-term X-ray imaging and permanent embolization of arteries**

Wenjing Xie<sup>1,\*</sup>, Han Li<sup>3,\*</sup>, Houqiang Yu<sup>6,\*</sup>, Hongfu Zhou<sup>1</sup>, Anran Guo<sup>1</sup>, Qing Yao<sup>5</sup>,  
Ling Zhang<sup>1</sup>, Yongsheng Zhao<sup>4,#</sup>, Hongan Tian<sup>2,#</sup>, Ling Li<sup>1,#</sup>

1. School of Biomedical Engineering and Imaging, Xianning Medical College, Hubei University of Science and Technology, Xianning 437100, PR China

2. Department of Radiology, Xianning Central Hospital, The First Affiliated Hospital of Hubei University of Science and Technology, Xianning, P.R. China

3. Intervention and Cell Therapy Center, Peking University Shenzhen Hospital , Shenzhen 518035, Guangdong, China

4. Department of Nuclear Medicine, Peking University Shenzhen Hospital, Shenzhen 518035, Guangdong, China

5. Hubei Key Laboratory of Diabetes and Angiopathy, Medicine Research Institute, Xianning Medical College, Hubei University of Science and Technology, Hubei Xianning , China

6. Department of mathematics and statistics, Hubei University of Science and Technology, Xianning 437100, PR China

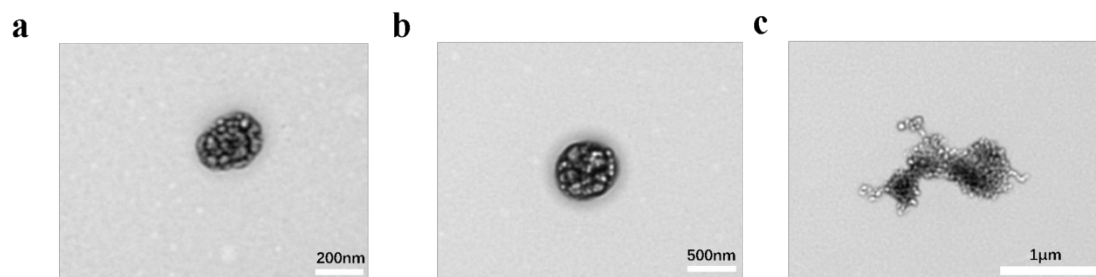

**Fig. S1** TEM images of (a) PNCAA-1, (b) PNCAA-3, (c) *u*PNCAA-2 nanogel.

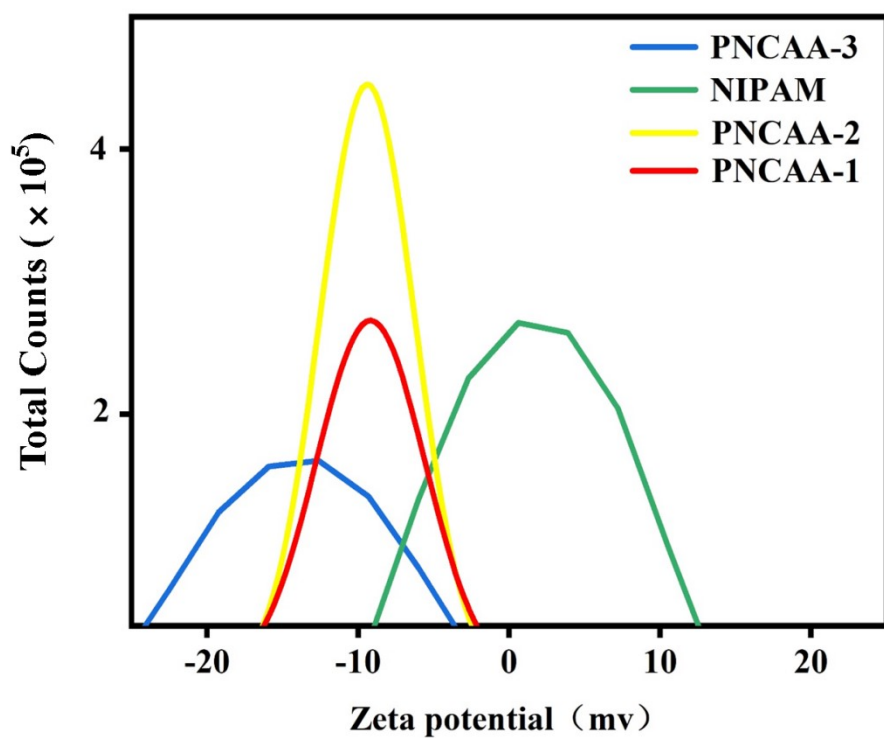

**Fig. S2** Zeta potential results of the different nanogels described above at 25°C.

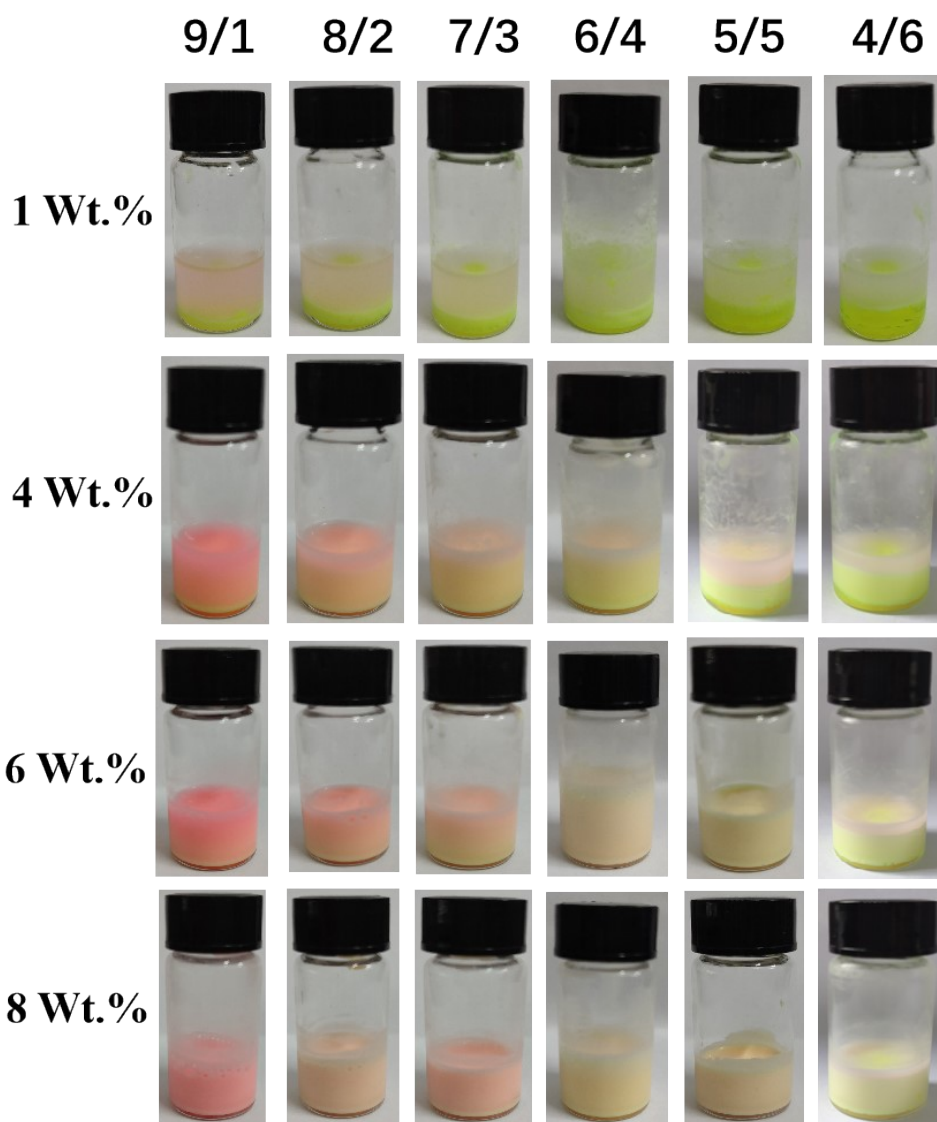

**Fig. S3** The TIPE stabilized by PNCAA-2 with different oil/water ratios and different nanogel concentrations, the samples were placed at 25°C for 1 day.

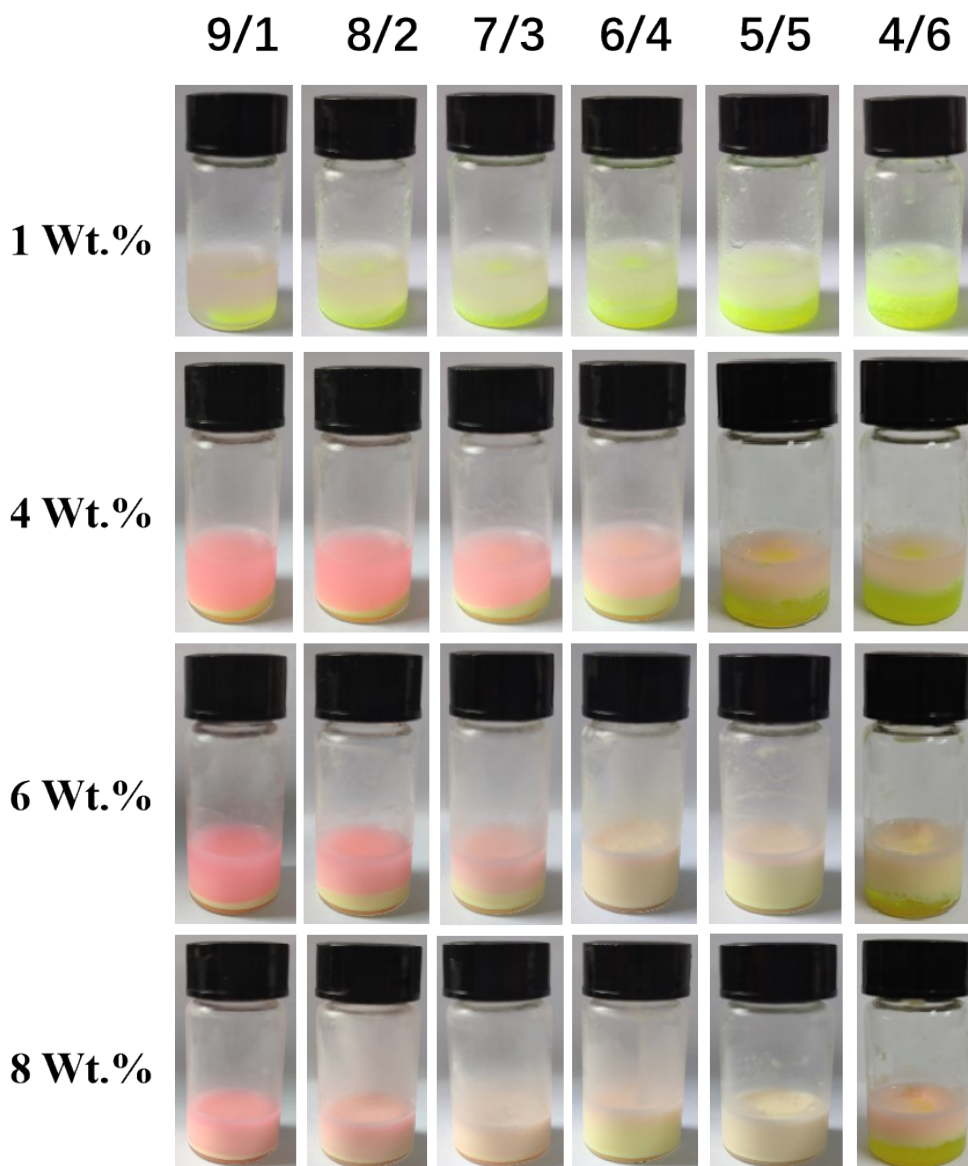

**Fig. S4** The TIPE stabilized by PNCAA-2 with different oil/water ratios and different nanogel concentrations, the samples were placed at 25°C for 3 days.

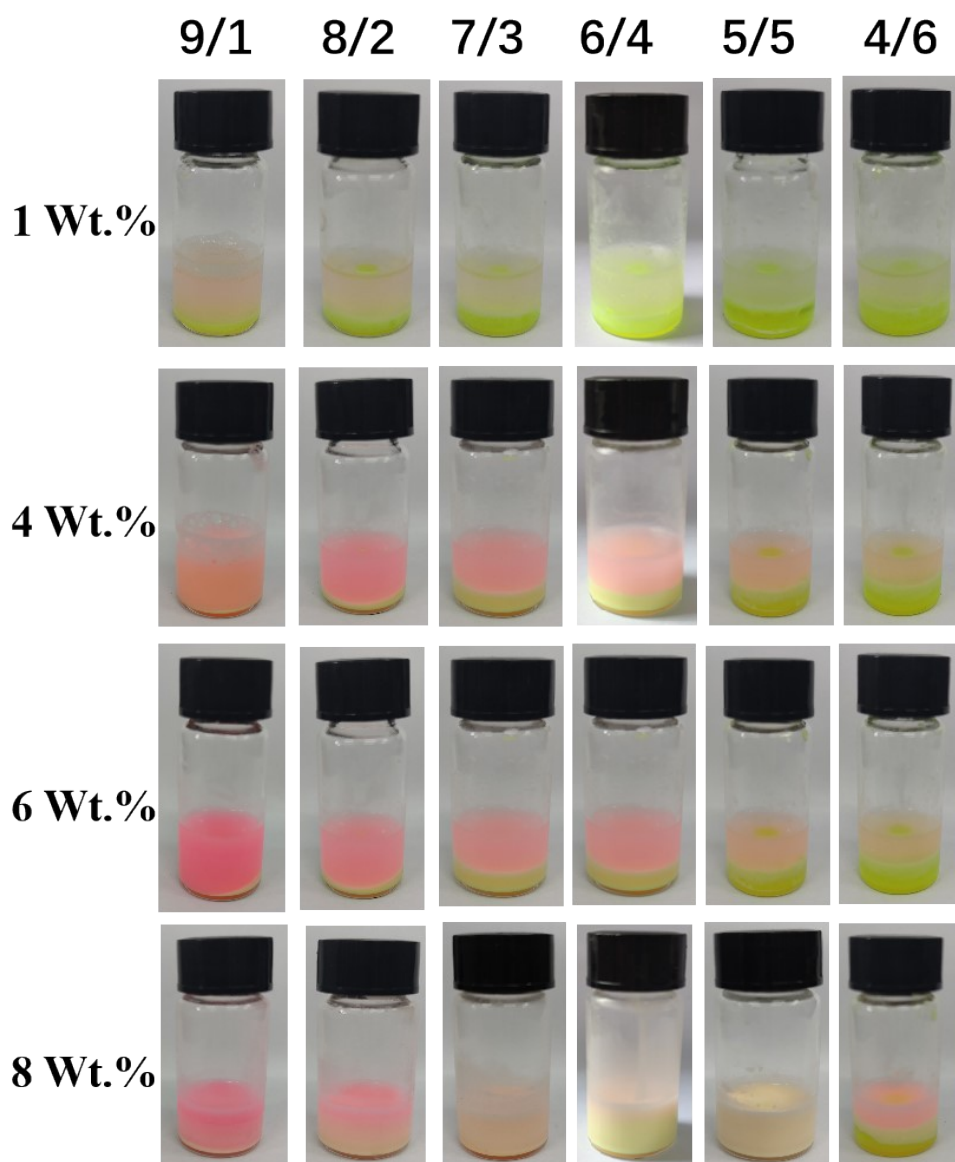

**Fig. S5** The TIPE stabilized by PNCAA-2 with different oil/water ratios and different nanogel concentrations, the samples were placed at 25°C for 7 days.



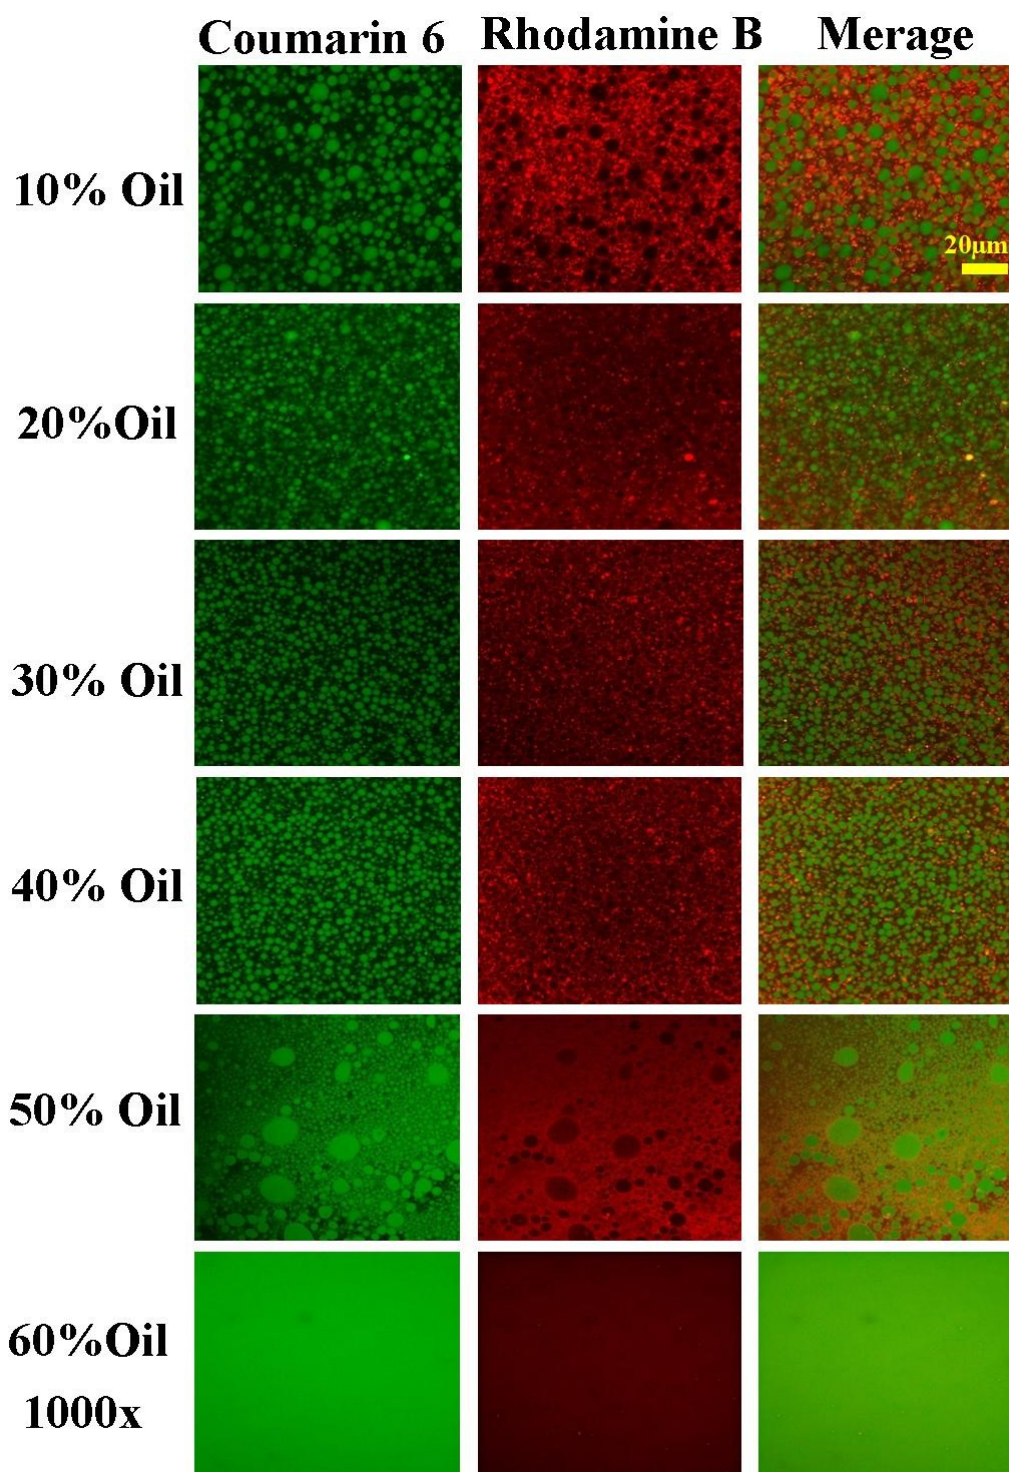

**Fig. S6** TIPE (8wt% PNCAA-2) droplets with different oil contents were observed under fluorescence confocal microscopy,  $\times 1000$ .

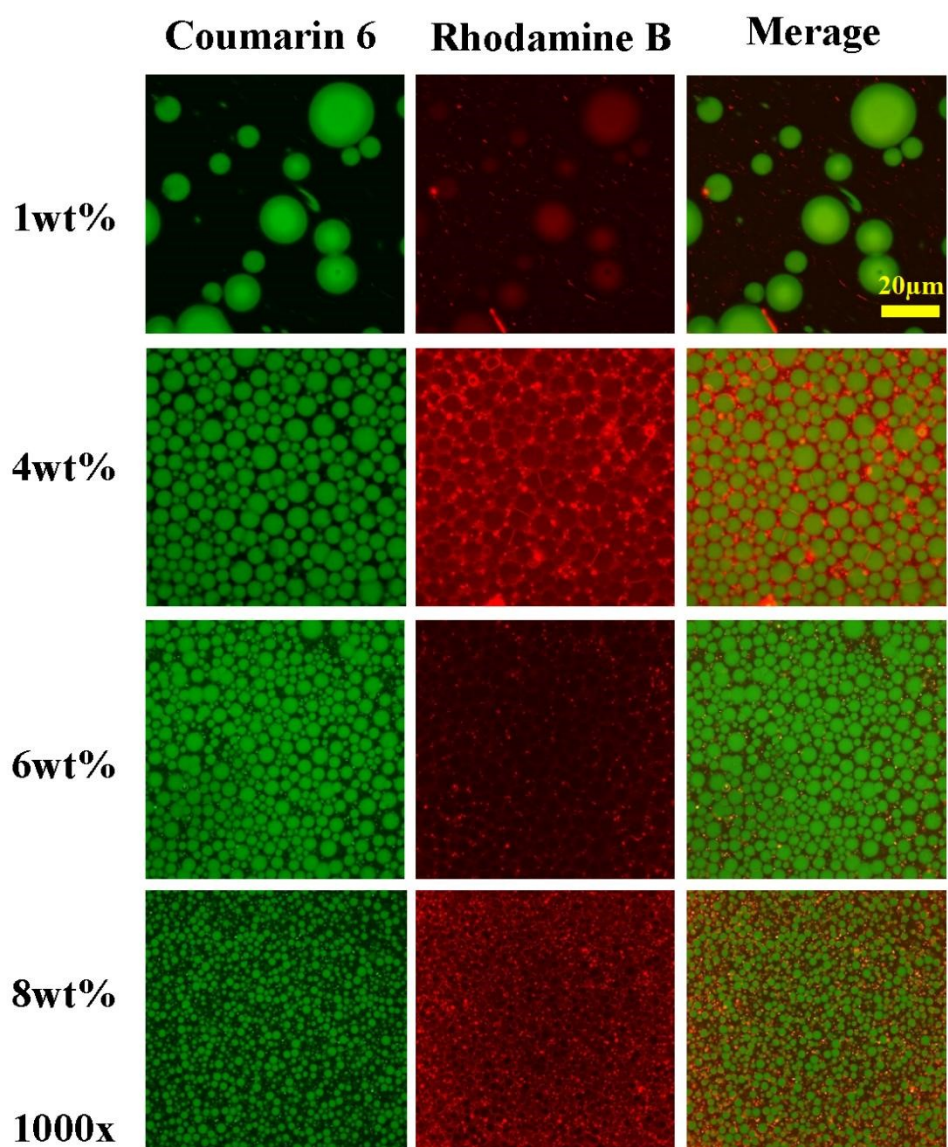

**Fig. S7** TIPE (oil/water ratio is 4/6) droplets with different concentrations of PNCAA-2 were observed under fluorescence confocal microscopy,  $\times 1000$ .



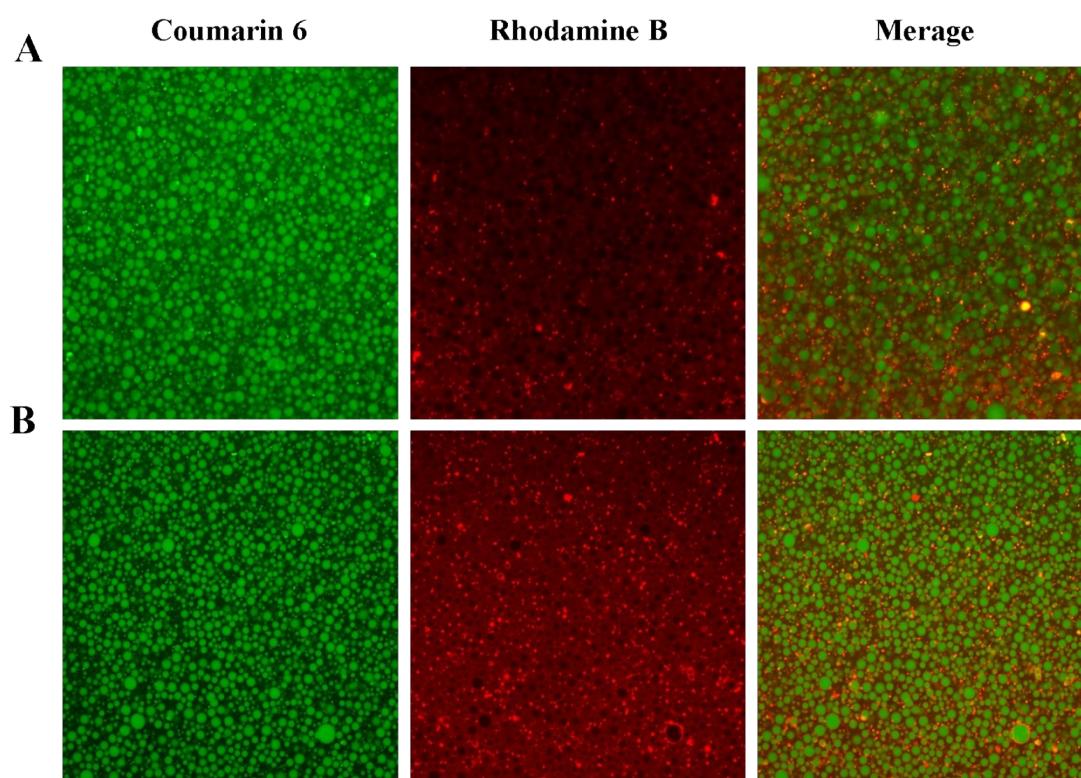

**Fig. S8** Confocal microscope images of TIPE (the oil/water ratio was 4:6, the PNCAA-2 concentration was 8wt%) at (A) 25°C and (B) 37°C,  $\times 1000$ .

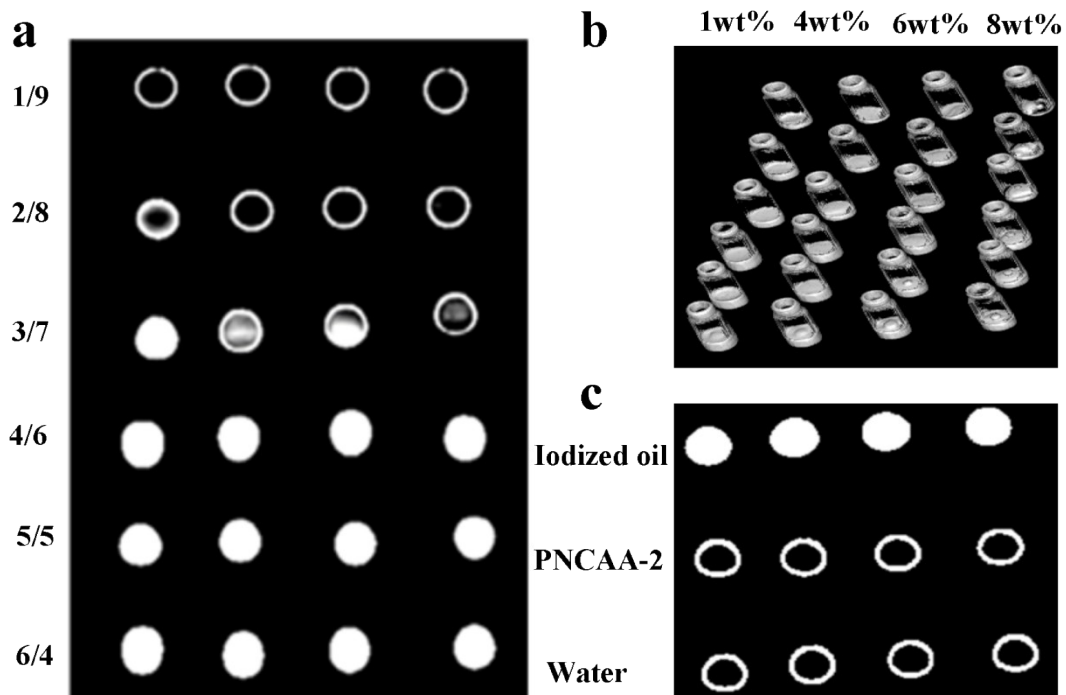

**Fig. S9** *In vitro* (a) CT tomograms and (b) 3D reconstructed CT images of TIPE stabilized by different PNCAA-2 concentrations and different oil/water ratios. (c) CT values of iodized oil, PNCAA-2 nanogel and water.

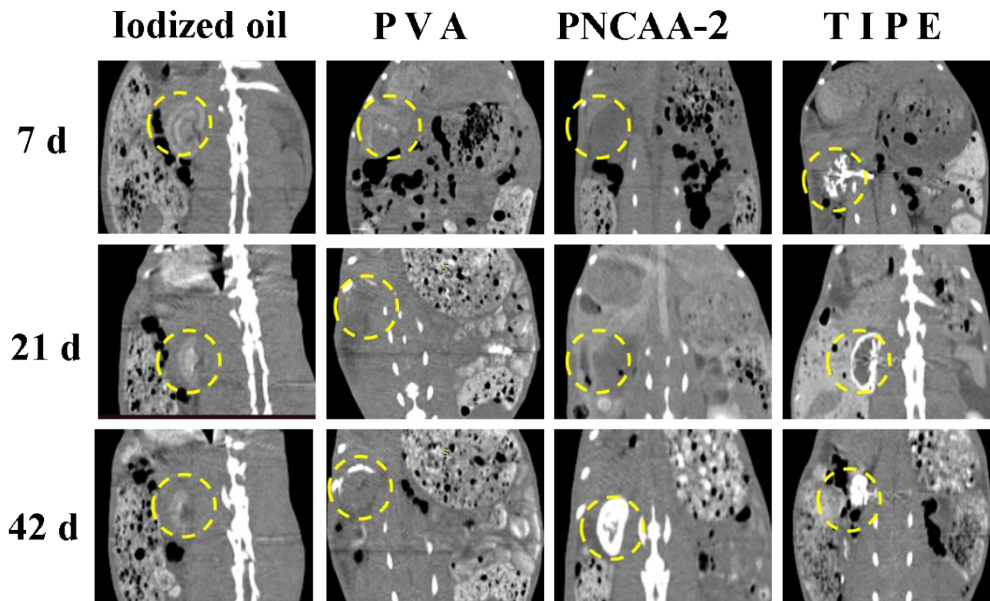

**Fig. S10** Coronal CT images of New Zealand white rabbits on the 7, 21, 42 days after embolization by iodized oil, PVA, PNCAA-2, and TIPE, the pink circle marks the position of the kidney after embolization.

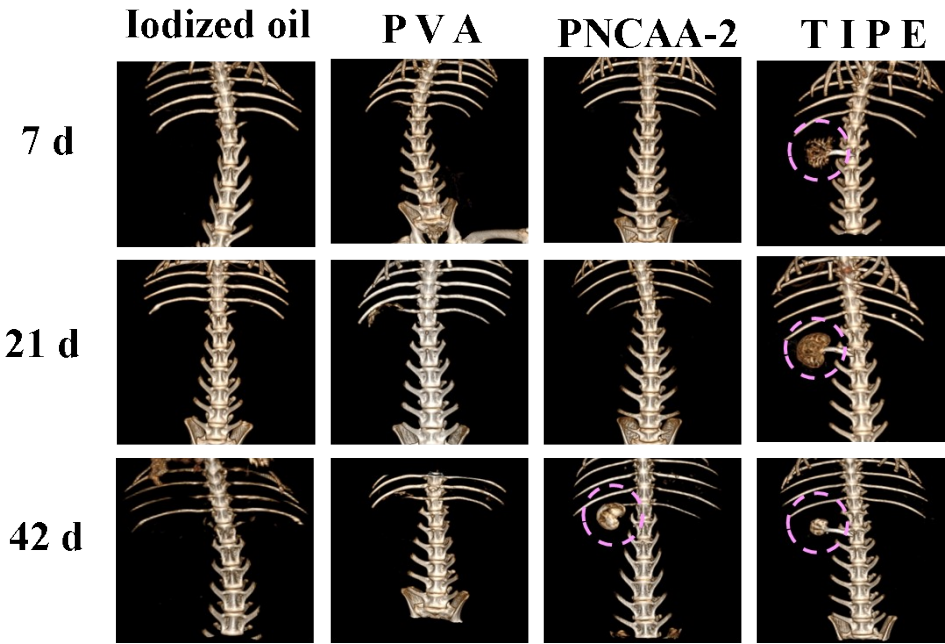

**Fig. S11** Bone phase CT images of New Zealand white rabbits on the 7, 21, 42 days after embolization by iodized oil, PVA, PNCAA-2, and TIPE, the pink circle marks the position of the kidney after embolization.
